# Supplementary material for: Age‐associated change in pyruvate metabolism investigated with hyperpolarized 13C‐MRI of the human brain
Source: PubMed Central journal article supplement — Hum Brain Mapp. 2023 May 23;44(10):4052–63. doi: 10.1002/hbm.26329 (PMC10258534; doi:10.1002/hbm.26329), 2023-05-23
Supplement: HBM-44-4052-s001.pdf [file HBM-44-4052-s001.pdf]

## Supplementary material

|                                          |                                                                                                                                                                                                                    |
|------------------------------------------|--------------------------------------------------------------------------------------------------------------------------------------------------------------------------------------------------------------------|
| <b>RF-spoiled gradient echo</b>          | 1 mm isotropic resolution<br>FOV 25.6 x 25.6 cm <sup>2</sup><br>166 slices<br>TE 2.9 ms, TR 7.6 ms<br>11° flip angle                                                                                               |
| <b><sup>13</sup>C-image acquisition</b>  | 15 mm isotropic resolution<br>FOV 24 x 24 <sup>2</sup><br>24 slices<br>11° flip angle for <sup>13</sup> C-pyruvate<br>80° flip angle for <sup>13</sup> C-lactate<br>80° flip angle for <sup>13</sup> C-bicarbonate |
| <b><sup>13</sup>C-spectroscopy slab)</b> | 100 mm slab thickness<br>10° flip angle<br>16384 samples at 32 kHz<br>512 ms acquisition time                                                                                                                      |

Table 1: Scan parameters for T1-weighted anatomical images, <sup>13</sup>C-image acquisition and <sup>13</sup>C-spectroscopy slab acquisitions.

Let the regression coefficient for the effect of age on a log-transformed variable of interest be  $\beta_{age}$ , which gives the change in the log variable per year. This can be converted to a percentage change per decade of the anti-log-transformed variable,  $p_{decade}$ , as follows:

$$p_{decade} = (1 - e^{10\beta_{age}}) \times 100\% \quad [1]$$

| <b>Models compared with ANOVA for <math>L_P</math></b> | <b>p-value</b> |
|--------------------------------------------------------|----------------|
| Brain region vs brain region + sex                     | 0.2            |
| Brain region vs brain region + weight                  | 0.06           |
| Brain region vs brain region + age                     | 0.01           |
| Brain region + age vs brain region + age + weight      | 0.09           |
| Brain region + age vs brain region * age               | 0.002          |
| Brain region * age vs brain region * age + weight      | 0.09           |

Table 2: Example results from the iterative process used when mixed-effect model building for  $\log(L_P)$ . The p-value results from an ANOVA comparing the two listed models, with a significant p-value suggesting that the inclusion of an additional variable or interaction significantly improved the modelling of the observed variance. The first test suggested that biological sex should not be included. The same was found for the next model, which tested brain region versus both brain region and weight as independent fixed effects. This process resulted in the final model with age, region and an interaction (indicated by \*) between age and region.

| <b>Models compared with ANOVA for <math>B_P</math></b> | <b>p-value</b> |
|--------------------------------------------------------|----------------|
| Brain region vs brain region + sex                     | 0.09           |
| Brain region vs brain region + weight                  | 0.1            |
| Brain region vs brain region + age                     | 0.009          |
| Brain region + age vs brain region + age + weight      | 0.2            |
| Brain region + age vs brain region * age               | <0.0001        |
| Brain region * age vs brain region * age + weight      | 0.2            |

Table 3: Example results from the iterative process used when mixed-effect model building for  $\log(B_P)$ . The p-value results from an ANOVA comparing the two listed models, with a significant p-value suggesting that the inclusion of an additional variable or interaction significantly improved the modelling of the observed variance. The first test suggested that biological sex should not be included. The same was found for the next model, which tested brain region versus both brain region and weight as independent fixed effects. This process resulted in the final model with age, region and an interaction (indicated by \*) between age and region.

| <b>Factor</b>     | <b>DFn</b> | <b>DFd</b> | <b>F</b> | <b>p</b> |
|-------------------|------------|------------|----------|----------|
| Age (categorical) | 1          | 33         | 12.5     | 0.001    |
| Region            | 131        | 4323       | 42.9     | < 0.0001 |
| Age:Region        | 131        | 4323       | 1.2      | 0.04     |

Table 4: Mixed-effects ANOVA table for the log of the dependent variable  $L_P$  vs. age, region, and an age-region interaction term.

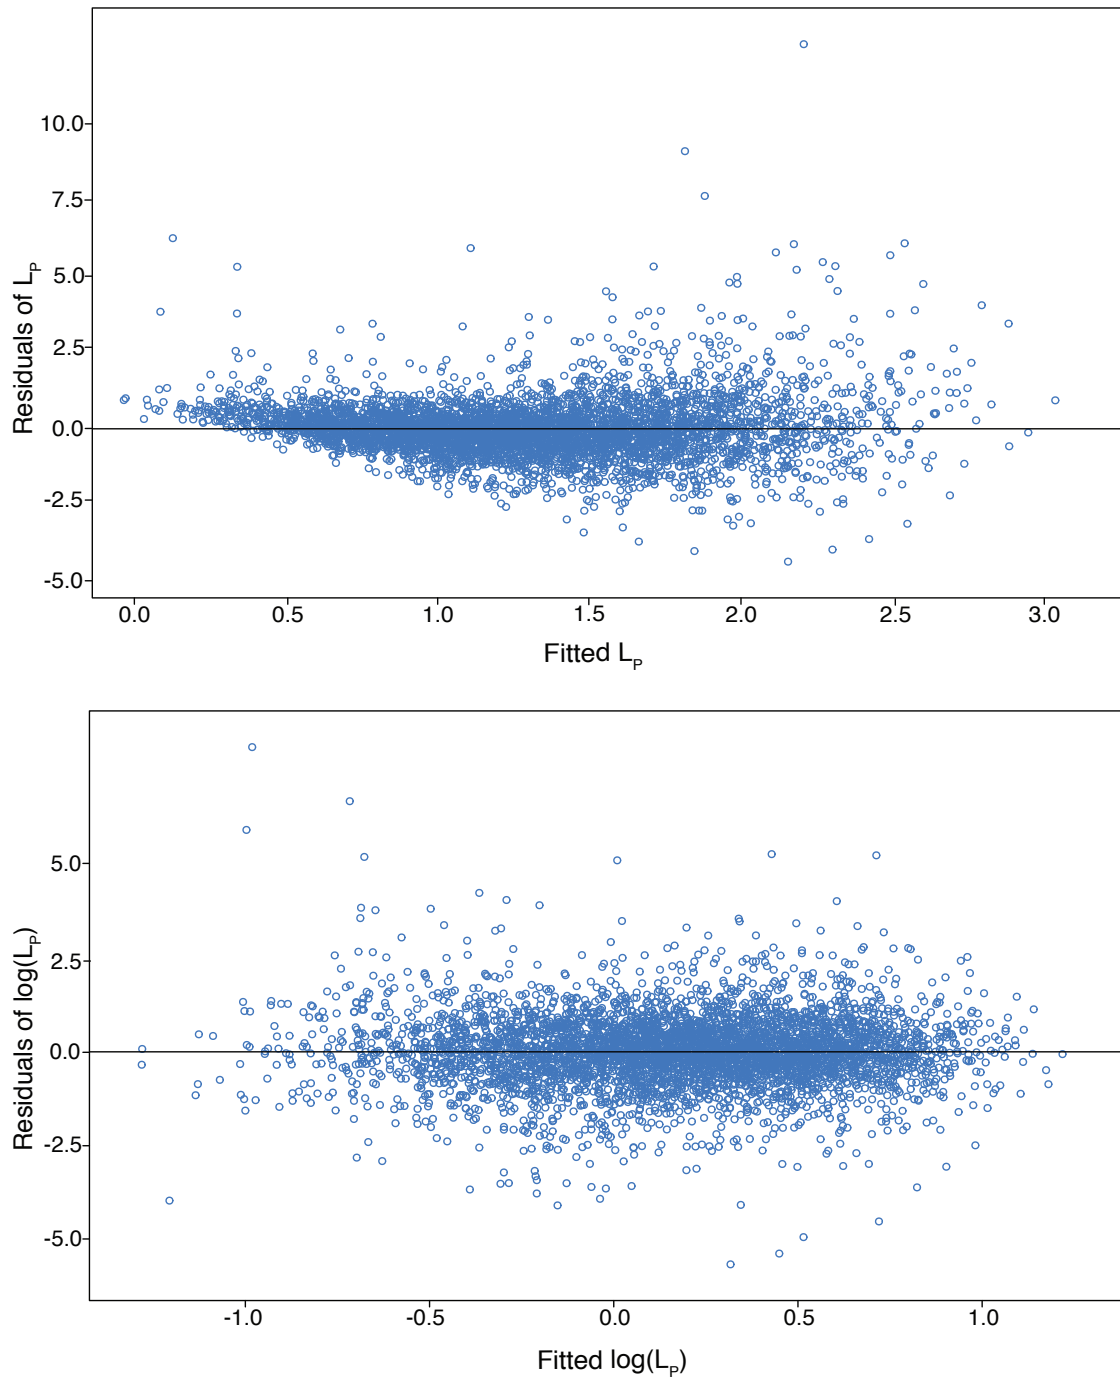

Figure S1: Transformation of  $L_P$  data to log-scale significantly improves heteroscedasticity in observed data. Residuals as a function of fitted values from the regression model using (a) the ratio  $L_P$  as the dependent variable and (b) using  $\log(L_P)$ . Heteroscedasticity, where variance of the residuals depends on  $L_P$  values, can be observed in (a) whereas taking the log of  $L_P$  achieves a homoscedastic distribution (b).

| <b>Factor</b>     | <b>DFn</b> | <b>DFd</b> | <b>F</b> | <b>p</b> |
|-------------------|------------|------------|----------|----------|
| Age (categorical) | 1          | 33         | 12.2     | 0.001    |
| Region            | 131        | 4323       | 28.9     | < 0.0001 |
| Age:Region        | 131        | 4323       | 1.0      | 0.5      |

Table 5: Mixed-effects ANOVA table for log of the dependent variable  $B_P$  vs. age, region and an age-region interaction term.

| <b>Region</b>      | <b>Estimate</b> | <b>t-statistic</b> | <b>p-value</b> |
|--------------------|-----------------|--------------------|----------------|
| R-POrG             | -0.54           | -4.5               | 0.00008        |
| L-SCA              | -0.53           | -4.4               | 0.0001         |
| L-AcA              | -0.51           | -4.3               | 0.0002         |
| L-MCgG             | -0.50           | -4.1               | 0.0002         |
| R-AntIns           | -0.49           | -4.1               | 0.0003         |
| R-OrlFG            | -0.49           | -4.0               | 0.0003         |
| L-Calc             | -0.47           | -3.9               | 0.0004         |
| R-VentDC           | -0.47           | -3.9               | 0.0005         |
| R-MPrG             | -0.47           | -3.9               | 0.0005         |
| L-BasForbr         | -0.46           | -3.8               | 0.0006         |
| CerebVermLob VII-X | -0.45           | -3.7               | 0.0007         |
| L-Ent              | -0.45           | -3.7               | 0.0007         |
| L-AntIns           | -0.45           | -3.7               | 0.0008         |
| R-MCgG             | -0.44           | -3.7               | 0.0009         |
| L-OpIFG            | -0.44           | -3.6               | 0.001          |
| R-TrIFG            | -0.44           | -3.6               | 0.001          |
| R-FO               | -0.43           | -3.6               | 0.001          |
| L-FuG              | -0.43           | -3.5               | 0.001          |
| L-POrG             | -0.43           | -3.5               | 0.001          |
| L-TrIFG            | -0.43           | -3.5               | 0.001          |
| 4th Vent           | -0.42           | -3.5               | 0.001          |
| L-MFC              | -0.42           | -3.5               | 0.001          |
| L-Gre              | -0.42           | -3.5               | 0.001          |
| L-PCgG             | -0.42           | -3.5               | 0.001          |
| L-OrlFG            | -0.42           | -3.4               | 0.002          |
| R-PCgG             | -0.41           | -3.4               | 0.002          |
| L-Amyg             | -0.41           | -3.4               | 0.002          |
| L-FO               | -0.41           | -3.4               | 0.002          |
| L-Pins             | -0.41           | -3.4               | 0.002          |
| R-PT               | -0.40           | -3.3               | 0.002          |
| R-ThalProp         | -0.40           | -3.3               | 0.002          |
| L-PO               | -0.40           | -3.3               | 0.002          |
| L-PT               | -0.40           | -3.3               | 0.002          |
| R-MOrG             | -0.39           | -3.3               | 0.003          |
| L-VentDC           | -0.39           | -3.3               | 0.003          |
| L-TTG              | -0.39           | -3.2               | 0.003          |
| L-MOrG             | -0.39           | -3.2               | 0.003          |
| L-CO               | -0.38           | -3.2               | 0.003          |
| R-MPoG             | -0.38           | -3.2               | 0.003          |
| L-OFuG             | -0.38           | -3.2               | 0.003          |
| L-CerebelWM        | -0.38           | -3.2               | 0.003          |
| R-LiG              | -0.38           | -3.2               | 0.003          |
| R-CO               | -0.38           | -3.2               | 0.003          |
| L-PHG              | -0.38           | -3.2               | 0.003          |

|                     |       |      |       |
|---------------------|-------|------|-------|
| L-PP                | -0.38 | -3.2 | 0.003 |
| R-TTG               | -0.38 | -3.2 | 0.003 |
| CerebVermLob I-V    | -0.38 | -3.1 | 0.004 |
| R-BasForbr          | -0.37 | -3.1 | 0.004 |
| L-ITG               | -0.37 | -3.1 | 0.004 |
| R-PP                | -0.37 | -3.1 | 0.004 |
| R-Pins              | -0.37 | -3.0 | 0.005 |
| L-CerebelEx         | -0.37 | -3.0 | 0.005 |
| R-Pall              | -0.37 | -3.0 | 0.005 |
| CerebVermLob VI-VII | -0.36 | -3.0 | 0.005 |
| L-LiG               | -0.36 | -3.0 | 0.005 |
| L-TMP               | -0.36 | -3.0 | 0.005 |
| R-TMP               | -0.36 | -3.0 | 0.006 |
| R-SMC               | -0.36 | -2.9 | 0.006 |
| L-Putam             | -0.36 | -2.9 | 0.006 |
| R-Pcu               | -0.36 | -2.9 | 0.006 |
| R-CerebelEx         | -0.35 | -2.9 | 0.006 |
| R-LOrG              | -0.35 | -2.9 | 0.006 |
| L-MPoG              | -0.35 | -2.9 | 0.006 |
| 3rd Vent            | -0.35 | -2.9 | 0.006 |
| L-MPrG              | -0.35 | -2.9 | 0.006 |
| R-MSFG              | -0.35 | -2.9 | 0.007 |
| R-STG               | -0.35 | -2.9 | 0.007 |
| R-OFuG              | -0.35 | -2.9 | 0.007 |
| R-Putam             | -0.34 | -2.8 | 0.008 |
| L-ACgG              | -0.34 | -2.8 | 0.008 |
| L-PrG               | -0.34 | -2.8 | 0.009 |
| R-Cun               | -0.34 | -2.8 | 0.009 |
| L-Hc                | -0.33 | -2.7 | 0.010 |
| L-CerebWM           | -0.33 | -2.7 | 0.01  |
| R-OpIFG             | -0.33 | -2.7 | 0.01  |
| L-AnG               | -0.33 | -2.7 | 0.01  |
| R-Amyg              | -0.33 | -2.7 | 0.01  |
| L-STG               | -0.32 | -2.7 | 0.01  |
| L-InfLatVent        | -0.32 | -2.7 | 0.01  |
| L-ThalProp          | -0.32 | -2.6 | 0.01  |
| R-AnG               | -0.32 | -2.6 | 0.01  |
| R-ACgG              | -0.32 | -2.6 | 0.01  |
| L-IOG               | -0.32 | -2.6 | 0.01  |
| L-MSFG              | -0.32 | -2.6 | 0.01  |
| R-PoG               | -0.32 | -2.6 | 0.01  |
| R-CerebWM           | -0.31 | -2.6 | 0.01  |
| R-SCA               | -0.31 | -2.6 | 0.01  |
| R-PO                | -0.31 | -2.6 | 0.01  |
| L-SMC               | -0.31 | -2.6 | 0.01  |

|              |       |      |      |
|--------------|-------|------|------|
| R-Calc       | -0.31 | -2.6 | 0.02 |
| R-MFC        | -0.31 | -2.5 | 0.02 |
| R-ITG        | -0.31 | -2.5 | 0.02 |
| R-MOG        | -0.31 | -2.5 | 0.02 |
| R-SOG        | -0.30 | -2.5 | 0.02 |
| L-Cun        | -0.30 | -2.5 | 0.02 |
| R-CerebelWM  | -0.30 | -2.5 | 0.02 |
| R-Hc         | -0.30 | -2.5 | 0.02 |
| R-SMG        | -0.30 | -2.5 | 0.02 |
| Brainstem    | -0.30 | -2.5 | 0.02 |
| L-SMG        | -0.29 | -2.4 | 0.02 |
| R-IOG        | -0.29 | -2.4 | 0.02 |
| R-Gre        | -0.29 | -2.4 | 0.02 |
| L-AOrG       | -0.29 | -2.4 | 0.02 |
| R-Ent        | -0.28 | -2.4 | 0.02 |
| L-FRP        | -0.28 | -2.4 | 0.02 |
| L-LOrG       | -0.28 | -2.3 | 0.03 |
| R-PrG        | -0.28 | -2.3 | 0.03 |
| L-Pcu        | -0.28 | -2.3 | 0.03 |
| L-MFG        | -0.28 | -2.3 | 0.03 |
| R-PHG        | -0.27 | -2.3 | 0.03 |
| R-LatVent    | -0.27 | -2.3 | 0.03 |
| L-MTG        | -0.27 | -2.2 | 0.03 |
| R-MTG        | -0.27 | -2.2 | 0.03 |
| R-FuG        | -0.27 | -2.2 | 0.03 |
| L-LatVent    | -0.27 | -2.2 | 0.03 |
| R-InfLatVent | -0.26 | -2.2 | 0.04 |
| L-SFG        | -0.26 | -2.2 | 0.04 |
| L-SPL        | -0.26 | -2.2 | 0.04 |
| L-Pall       | -0.26 | -2.1 | 0.04 |

Table 6: Regions with significant differences in  $\log(L_P)$  between old and young groups as tested through a t-statistic. All tests were done using the marginal means of  $\log(L_P)$  for each brain region as predicted by mixed-effects regression. The ‘‘Estimate’’ column shows the difference in estimated  $\log(L_P)$  between ‘old’ and ‘young’ groups. All listed regions had  $p$ -values below an adjusted alpha calculated using the Benjamini-Hochberg method.

| <b>Region</b> | <b>Estimate</b> | <b>t-statistic</b> | <b>p-value</b> |
|---------------|-----------------|--------------------|----------------|
| L-Amyg        | -0.6            | -3.9               | 0.01           |
| L-Ent         | -0.6            | -4.0               | 0.01           |
| L-OrlFG       | -0.6            | -4.0               | 0.01           |
| L-Pins        | -0.6            | -3.9               | 0.01           |
| R-AntIns      | -0.6            | -3.8               | 0.01           |
| R-MPoG        | -0.6            | -3.8               | 0.01           |

|                     |      |      |      |
|---------------------|------|------|------|
| R-MPrG              | -0.6 | -4.1 | 0.01 |
| L-AntIns            | -0.6 | -3.7 | 0.01 |
| L-PO                | -0.6 | -3.7 | 0.01 |
| R-OrIFG             | -0.6 | -3.7 | 0.01 |
| L-InfLatVent        | -0.6 | -3.6 | 0.01 |
| R-TMP               | -0.6 | -3.6 | 0.01 |
| L-Gre               | -0.6 | -3.6 | 0.01 |
| 4th Vent            | -0.6 | -3.5 | 0.01 |
| L-Calc              | -0.5 | -3.3 | 0.01 |
| L-CerebelEx         | -0.5 | -3.3 | 0.01 |
| L-CO                | -0.5 | -3.4 | 0.01 |
| L-FO                | -0.5 | -3.4 | 0.01 |
| L-PCgG              | -0.5 | -3.4 | 0.01 |
| L-PT                | -0.5 | -3.4 | 0.01 |
| L-TrIFG             | -0.5 | -3.3 | 0.01 |
| L-TTG               | -0.5 | -3.3 | 0.01 |
| R-AOrG              | -0.5 | -3.3 | 0.01 |
| R-InfLatVent        | -0.5 | -3.3 | 0.01 |
| R-LOrG              | -0.5 | -3.3 | 0.01 |
| R-PCgG              | -0.5 | -3.4 | 0.01 |
| R-Pins              | -0.5 | -3.3 | 0.01 |
| R-POrG              | -0.5 | -3.4 | 0.01 |
| R-PP                | -0.5 | -3.4 | 0.01 |
| L-ACgG              | -0.5 | -3.2 | 0.01 |
| Brainstem           | -0.5 | -3.1 | 0.01 |
| CerebVermLob VI-VII | -0.5 | -3.1 | 0.01 |
| L-FuG               | -0.5 | -3.1 | 0.01 |
| L-Hc                | -0.5 | -3.2 | 0.01 |
| L-MFC               | -0.5 | -3.1 | 0.01 |
| L-POrG              | -0.5 | -3.1 | 0.01 |
| L-PP                | -0.5 | -3.1 | 0.01 |
| R-BasForbr          | -0.5 | -3.1 | 0.01 |
| R-FO                | -0.5 | -3.2 | 0.01 |
| R-ITG               | -0.5 | -3.1 | 0.01 |
| L-MOrG              | -0.5 | -3.0 | 0.01 |
| L-MPoG              | -0.5 | -3.1 | 0.01 |
| L-MPrG              | -0.5 | -3.0 | 0.01 |
| L-OFuG              | -0.5 | -3.1 | 0.01 |
| L-Putam             | -0.5 | -3.0 | 0.01 |
| L-TMP               | -0.5 | -3.1 | 0.01 |
| R-OFuG              | -0.5 | -3.0 | 0.01 |
| 3rd Vent            | -0.5 | -3.0 | 0.01 |
| CerebVermLob I-V    | -0.5 | -2.9 | 0.02 |
| L-LOrG              | -0.5 | -3.0 | 0.02 |
| R-Ent               | -0.5 | -2.9 | 0.02 |



|                    |      |      |      |
|--------------------|------|------|------|
| R-Hc               | -0.5 | -3.0 | 0.02 |
| R-Pcu              | -0.5 | -2.9 | 0.02 |
| R-VentDC           | -0.5 | -2.9 | 0.02 |
| R-CO               | -0.5 | -2.9 | 0.02 |
| R-Gre              | -0.5 | -2.9 | 0.02 |
| L-ITG              | -0.5 | -2.8 | 0.02 |
| L-OplFG            | -0.5 | -2.8 | 0.02 |
| L-PHG              | -0.5 | -2.9 | 0.02 |
| L-SCA              | -0.5 | -2.8 | 0.02 |
| L-STG              | -0.4 | -2.8 | 0.02 |
| L-VentDC           | -0.5 | -2.9 | 0.02 |
| R-LiG              | -0.5 | -2.8 | 0.02 |
| R-MOrG             | -0.5 | -2.8 | 0.02 |
| L-BasForbr         | -0.4 | -2.8 | 0.02 |
| R-CerebelWM        | -0.4 | -2.8 | 0.02 |
| R-PHG              | -0.4 | -2.7 | 0.02 |
| L-IOG              | -0.4 | -2.7 | 0.02 |
| L-MCgG             | -0.4 | -2.7 | 0.02 |
| R-MCgG             | -0.4 | -2.7 | 0.02 |
| R-PT               | -0.4 | -2.7 | 0.02 |
| R-AnG              | -0.4 | -2.7 | 0.02 |
| R-MOG              | -0.4 | -2.7 | 0.02 |
| L-OCP              | -0.4 | -2.7 | 0.02 |
| L-FRP              | -0.4 | -2.6 | 0.02 |
| L-LiG              | -0.4 | -2.6 | 0.02 |
| R-CerebelEx        | -0.4 | -2.7 | 0.02 |
| R-Amyg             | -0.4 | -2.6 | 0.02 |
| R-SMC              | -0.4 | -2.6 | 0.02 |
| R-STG              | -0.4 | -2.6 | 0.02 |
| L-AnG              | -0.4 | -2.6 | 0.02 |
| CerebVermLob VII-X | -0.4 | -2.6 | 0.02 |
| R-SCA              | -0.4 | -2.6 | 0.02 |
| L-MSFG             | -0.4 | -2.6 | 0.02 |
| L-MTG              | -0.4 | -2.6 | 0.02 |
| R-ThalProp         | -0.4 | -2.5 | 0.02 |
| L-CerebelWM        | -0.4 | -2.5 | 0.02 |
| L-CerebWM          | -0.4 | -2.5 | 0.02 |
| R-FuG              | -0.4 | -2.5 | 0.02 |
| R-IOG              | -0.4 | -2.5 | 0.02 |
| L-AcA              | -0.4 | -2.5 | 0.02 |
| L-SMG              | -0.4 | -2.5 | 0.02 |
| R-CerebWM          | -0.4 | -2.5 | 0.03 |
| L-PrG              | -0.4 | -2.5 | 0.03 |
| L-ThalProp         | -0.4 | -2.5 | 0.03 |
| L-AOrG             | -0.4 | -2.4 | 0.03 |

|         |      |      |      |
|---------|------|------|------|
| R-PoG   | -0.4 | -2.4 | 0.03 |
| R-OpIFG | -0.4 | -2.4 | 0.03 |
| R-Cun   | -0.4 | -2.4 | 0.03 |
| L-Pcu   | -0.4 | -2.3 | 0.03 |
| R-MFC   | -0.4 | -2.3 | 0.04 |
| R-TTG   | -0.4 | -2.3 | 0.04 |
| R-SOG   | -0.4 | -2.3 | 0.04 |
| L-Cun   | -0.4 | -2.3 | 0.04 |
| R-SMG   | -0.4 | -2.2 | 0.04 |
| R-MSFG  | -0.4 | -2.2 | 0.04 |
| R-PrG   | -0.3 | -2.2 | 0.04 |

Table 7: Regions with significant differences in  $\log(B_P)$  between old and young groups as tested through a t-statistic. All tests were done using the marginal means of  $\log(B_P)$  for each brain region as predicted by mixed-effects regression. The ‘‘Estimate’’ column shows the difference in estimated  $\log(B_P)$  between ‘old’ and ‘young’ groups. All listed regions had  $p$ -values below an adjusted alpha calculated using the Benjamini-Hochberg method.

|                     |                                     |
|---------------------|-------------------------------------|
| 3rd Vent            | 3rd-Ventricle                       |
| 4th Vent            | 4th-Ventricle                       |
| R-AcA               | Right-Accumbens-Area                |
| L-AcA               | Left-Accumbens-Area                 |
| R-Amyg              | Right-Amygdala                      |
| L-Amyg              | Left-Amygdala                       |
| Brainstem           | Brain-Stem                          |
| R-Caud              | Right-Caudate                       |
| L-Caud              | Left-Caudate                        |
| R-CerebelEx         | Right-Cerebellum-Exterior           |
| L-CerebelEx         | Left-Cerebellum-Exterior            |
| R-CerebelWM         | Right-Cerebellum-White-Matter       |
| L-CerebelWM         | Left-Cerebellum-White-Matter        |
| R-CerebWM           | Right-Cerebral-White-Matter         |
| L-CerebWM           | Left-Cerebral-White-Matter          |
| R-Hc                | Right-Hippocampus                   |
| L-Hc                | Left-Hippocampus                    |
| R-InfLatVent        | Right-Inf-Lat-Vent                  |
| L-InfLatVent        | Left-Inf-Lat-Vent                   |
| R-LatVent           | Right-Lateral-Ventricle             |
| L-LatVent           | Left-Lateral-Ventricle              |
| R-Pall              | Right-Pallidum                      |
| L-Pall              | Left-Pallidum                       |
| R-Putam             | Right-Putamen                       |
| L-Putam             | Left-Putamen                        |
| R-ThalProp          | Right-Thalamus-Proper               |
| L-ThalProp          | Left-Thalamus-Proper                |
| R-VentDC            | Right-Ventral-DC                    |
| L-VentDC            | Left-Ventral-DC                     |
| CerebVermLob I-V    | Cerebellar-Vermal-Lobules-I-V       |
| CerebVermLob VI-VII | Cerebellar-Vermal-Lobules-VI-VII    |
| CerebVermLob VII-X  | Cerebellar-Vermal-Lobules-VIII-X    |
| L-BasForbr          | Left-Basal-Forebrain                |
| R-BasForbr          | Right-Basal-Forebrain               |
| R-ACgG              | Right-ACgG—anterior-cingulate-gyrus |
| L-ACgG              | Left-ACgG—anterior-cingulate-gyrus  |
| R-AntIns            | Right-AIns—anterior-insula          |
| L-AntIns            | Left-AIns—anterior-insula           |
| R-AOrG              | Right-AOrG—anterior-orbital-gyrus   |
| L-AOrG              | Left-AOrG—anterior-orbital-gyrus    |
| R-AnG               | Right-AnG—angular-gyrus             |
| L-AnG               | Left-AnG—angular-gyrus              |
| R-Calc              | Right-Calc—calcarine-cortex         |
| L-Calc              | Left-Calc—calcarine-cortex          |
| R-CO                | Right-CO—central-operculum          |

|         |                                       |
|---------|---------------------------------------|
| L-CO    | Left-CO—central-operculum             |
| R-Cun   | Right-Cun—cuneus                      |
| L-Cun   | Left-Cun—cuneus                       |
| R-Ent   | Right-Ent—entorhinal-area             |
| L-Ent   | Left-Ent—entorhinal-area              |
| R-FO    | Right-FO—frontal-operculum            |
| L-FO    | Left-FO—frontal-operculum             |
| R-FRP   | Right-FRP—frontal-pole                |
| L-FRP   | Left-FRP—frontal-pole                 |
| R-FuG   | Right-FuG—fusiform-gyrus              |
| L-FuG   | Left-FuG—fusiform-gyrus               |
| R-Gre   | Right-GRe—gyrus-rectus                |
| L-Gre   | Left-GRe—gyrus-rectus                 |
| R-IOG   | Right-IOG—inferior-occipital-gyrus    |
| L-IOG   | Left-IOG—inferior-occipital-gyrus     |
| R-ITG   | Right-ITG—inferior-temporal-gyrus     |
| L-ITG   | Left-ITG—inferior-temporal-gyrus      |
| R-LiG   | Right-LiG—lingual-gyrus               |
| L-LiG   | Left-LiG—lingual-gyrus                |
| R-LOrG  | Right-LOrG—lateral-orbital-gyrus      |
| L-LOrG  | Left-LOrG—lateral-orbital-gyrus       |
| R-MCgG  | Right-MCgG—middle-cingulate-gyrus     |
| L-MCgG  | Left-MCgG—middle-cingulate-gyrus      |
| R-MFC   | Right-MFC—medial-frontal-cortex       |
| L-MFC   | Left-MFC—medial-frontal-cortex        |
| R-MFG   | Right-MFG—middle-frontal-gyrus        |
| L-MFG   | Left-MFG—middle-frontal-gyrus         |
| R-MOG   | Right-MOG—middle-occipital-gyrus      |
| L-MOG   | Left-MOG—middle-occipital-gyrus       |
| R-MOrG  | Right-MOrG—medial-orbital-gyrus       |
| L-MOrG  | Left-MOrG—medial-orbital-gyrus        |
| R-MPoG  | Right-MPoG—postcentral-gyrus          |
| L-MPoG  | Left-MPoG—postcentral-gyrus           |
| R-MPrG  | Right-MPrG—precentral-gyrus           |
| L-MPrG  | Left-MPrG—precentral-gyrus            |
| R-MSFG  | Right-MSFG—superior-frontal-gyrus     |
| L-MSFG  | Left-MSFG—superior-frontal-gyrus      |
| R-MTG   | Right-MTG—middle-temporal-gyrus       |
| L-MTG   | Left-MTG—middle-temporal-gyrus        |
| R-OCP   | Right-OCP—occipital-pole              |
| L-OCP   | Left-OCP—occipital-pole               |
| R-OFuG  | Right-OFuG—occipital-fusiform-gyrus   |
| L-OFuG  | Left-OFuG—occipital-fusiform-gyrus    |
| R-OpIFG | Right-OpIFG—opercular-part-of-the-IFG |
| L-OpIFG | Left-OpIFG—opercular-part-of-the-IFG  |

|         |                                        |
|---------|----------------------------------------|
| R-OrIFG | Right-OrIFG-orbital-part-of-the-IFG    |
| L-OrIFG | Left-OrIFG-orbital-part-of-the-IFG     |
| R-PCgG  | Right-PCgG—posterior-cingulate-gyrus   |
| L-PCgG  | Left-PCgG—posterior-cingulate-gyrus    |
| R-Pcu   | Right-PCu—precuneus                    |
| L-Pcu   | Left-PCu—precuneus                     |
| R-PHG   | Right-PHG—parahippocampal-gyrus        |
| L-PHG   | Left-PHG—parahippocampal-gyrus         |
| R-Pins  | Right-PIns—posterior-insula            |
| L-Pins  | Left-PIns—posterior-insula             |
| R-PO    | Right-PO—parietal-operculum            |
| L-PO    | Left-PO—parietal-operculum             |
| R-PoG   | Right-PoG—postcentral-gyrus            |
| L-PoG   | Left-PoG—postcentral-gyrus             |
| R-POrG  | Right-POrG—posterior-orbital-gyrus     |
| L-POrG  | Left-POrG—posterior-orbital-gyrus      |
| R-PP    | Right-PP—planum-polare                 |
| L-PP    | Left-PP—planum-polare                  |
| R-PrG   | Right-PrG—precentral-gyrus             |
| L-PrG   | Left-PrG—precentral-gyrus              |
| R-PT    | Right-PT—planum-temporale              |
| L-PT    | Left-PT—planum-temporale               |
| R-SCA   | Right-SCA—subcallosal-area             |
| L-SCA   | Left-SCA—subcallosal-area              |
| R-SFG   | Right-SFG—superior-frontal-gyrus       |
| L-SFG   | Left-SFG—superior-frontal-gyrus        |
| R-SMC   | Right-SMC—supplementary-motor-cortex   |
| L-SMC   | Left-SMC—supplementary-motor-cortex    |
| R-SMG   | Right-SMG—supramarginal-gyrus          |
| L-SMG   | Left-SMG—supramarginal-gyrus           |
| R-SOG   | Right-SOG—superior-occipital-gyrus     |
| L-SOG   | Left-SOG—superior-occipital-gyrus      |
| R-SPL   | Right-SPL—superior-parietal-lobule     |
| L-SPL   | Left-SPL—superior-parietal-lobule      |
| R-STG   | Right-STG—superior-temporal-gyrus      |
| L-STG   | Left-STG—superior-temporal-gyrus       |
| R-TMP   | Right-TMP—temporal-pole                |
| L-TMP   | Left-TMP—temporal-pole                 |
| R-TrIFG | Right-TrIFG-triangular-part-of-the-IFG |
| L-TrIFG | Left-TrIFG-triangular-part-of-the-IFG  |
| R-TTG   | Right-TTG—transverse-temporal-gyrus    |
| L-TTG   | Left-TTG—transverse-temporal-gyrus     |

Table 8: Definition of the brain region labels used in the figures.

## References

- [1] Carlos López-Otín, Maria A Blasco, Linda Partridge, Manuel Serrano, and Guido Kroemer. The hallmarks of aging. *Cell*, 153(6):1194–1217, 2013.
- [2] Hanzhang Lu, Feng Xu, Karen M Rodrigue, Kristen M Kennedy, Yamei Cheng, Blair Flicker, Andrew C Hebrank, Jinsoo Uh, and Denise C Park. Alterations in cerebral metabolic rate and blood supply across the adult lifespan. *Cerebral cortex*, 21(6):1426–1434, 2011.
- [3] Douglas N Greve, David H Salat, Spencer L Bowen, David Izquierdo-Garcia, Aaron P Schultz, Ciprian Catana, J Alex Becker, Claus Svarer, Gitte M Knudsen, Reisa A Sperling, et al. Different partial volume correction methods lead to different conclusions: an 18f-fdg-pet study of aging. *Neuroimage*, 132:334–343, 2016.
- [4] S Neil Vaishnavi, Andrei G Vlassenko, Melissa M Rundle, Abraham Z Snyder, Mark A Mintun, and Marcus E Raichle. Regional aerobic glycolysis in the human brain. *Proceedings of the National Academy of Sciences*, 107(41):17757–17762, 2010.
- [5] Manu S Goyal, Andrei G Vlassenko, Tyler M Blazey, Yi Su, Lars E Couture, Tony J Durbin, Randall J Bateman, Tammie L-S Benzinger, John C Morris, and Marcus E Raichle. Loss of brain aerobic glycolysis in normal human aging. *Cell metabolism*, 26(2):353–360, 2017.
- [6] Dominika Drulis-Fajdasz, Agnieszka Gizak, Tomasz Wójtowicz, Jacek R Wiśniewski, and Dariusz Rakus. Aging-associated changes in hippocampal glycogen metabolism in mice. evidence for and against astrocyte-to-neuron lactate shuttle. *Glia*, 66(7):1481–1495, 2018.
- [7] Luc Pellerin, Giovanni Pellegrini, Philippe G Bittar, Yves Charnay, Constantin Bouras, Jean-Luc Martin, Nephi Stella, and Pierre J Magistretti. Evidence supporting the existence of an activity-dependent astrocyte-neuron lactate shuttle. *Developmental neuroscience*, 20(4-5):291–299, 1998.
- [8] Ximena Castillo, Katia Rosafio, Matthias T Wyss, Konstantin Drandarov, Alfred Buck, Luc Pellerin, Bruno Weber, and Lorenz Hirt. A probable dual mode of action for both l-and d-lactate neuroprotection in cerebral ischemia. *Journal of cerebral blood flow & metabolism*, 35(10):1561–1569, 2015.
- [9] Akinobu Suzuki, Sarah A Stern, Ozlem Bozdagi, George W Huntley, Ruth H Walker, Pierre J Magistretti, and Cristina M Alberini. Astrocyte-neuron lactate transport is required for long-term memory formation. *Cell*, 144(5):810–823, 2011.
- [10] Yaeli Lev-Vachnisch, Sharon Cadury, Aviva Rotter-Maskowitz, Noa Feldman, Asael Roichman, Tomer Illouz, Alexander Varvak, Raneen Nicola, Ravit Madar, and Eitan Okun. L-lactate promotes adult hippocampal neurogenesis. *Frontiers in neuroscience*, 13:403, 2019.

- [11] Pierre J Magistretti and Igor Allaman. Lactate in the brain: from metabolic end-product to signalling molecule. *Nature Reviews Neuroscience*, 19(4):235–249, 2018.
- [12] Silvia Mangia, Ivan Tkáč, Rolf Gruetter, Pierre-Francois Van De Moortele, Federico Giove, Bruno Maraviglia, and Kâmil Uğurbil. Sensitivity of single-voxel 1h-mrs in investigating the metabolism of the activated human visual cortex at 7 t. *Magnetic resonance imaging*, 24(4):343–348, 2006.
- [13] Yury Koush, Robin A de Graaf, Lihong Jiang, Douglas L Rothman, and Fahmeed Hyder. Functional mrs with j-edited lactate in human motor cortex at 4 t. *NeuroImage*, 184:101–108, 2019.
- [14] Yury Koush, Robin A de Graaf, Ron Kupers, Laurence Dricot, Maurice Ptito, Kevin L Behar, Douglas L Rothman, and Fahmeed Hyder. Metabolic underpinnings of activated and deactivated cortical areas in human brain. *Journal of Cerebral Blood Flow & Metabolism*, 41(5):986–1000, 2021.
- [15] Casey Y Lee, Hany Soliman, Benjamin J Geraghty, Albert P Chen, Kim A Connelly, Ruby Endre, William J Perks, Chris Heyn, Sandra E Black, and Charles H Cunningham. Lactate topography of the human brain using hyperpolarized  $^{13}\text{C}$ -mri. *Neuroimage*, 204:116202, 2020.
- [16] Charles H Cunningham, Albert P Chen, Michael Lustig, Brian A Hargreaves, Janine Lupo, Duan Xu, John Kurhanewicz, Ralph E Hurd, John M Pauly, Sarah J Nelson, et al. Pulse sequence for dynamic volumetric imaging of hyperpolarized metabolic products. *Journal of magnetic resonance*, 193(1):139–146, 2008.
- [17] Benjamin J Geraghty, Justin YC Lau, Albert P Chen, and Charles H Cunningham. Dual-echo epi sequence for integrated distortion correction in 3d time-resolved hyperpolarized  $^{13}\text{C}$  mri. *Magnetic Resonance in Medicine*, 79(2):643–653, 2018.
- [18] MATLAB. *version 7.10.0 (R2019b)*. The MathWorks Inc., Natick, Massachusetts, 2019.
- [19] Arno Klein and Jason Tourville. 101 labeled brain images and a consistent human cortical labeling protocol. *Frontiers in neuroscience*, 6:171, 2012.
- [20] Yuankai Huo, Zhoubing Xu, Yunxi Xiong, Katherine Aboud, Prasanna Parvathaneni, Shunxing Bao, Camilo Bermudez, Susan M Resnick, Laurie E Cutting, and Bennett A Landman. 3d whole brain segmentation using spatially localized atlas network tiles. *NeuroImage*, 194:105–119, 2019.
- [21] Mark Jenkinson, Peter Bannister, Michael Brady, and Stephen Smith. Improved optimization for the robust and accurate linear registration and motion correction of brain images. *Neuroimage*, 17(2):825–841, 2002.
- [22] Russell V. Lenth. emmeans: Estimated marginal means, aka least-squares means. *R package version 1.7.3*, 2022.

- [23] Yoav Benjamini and Yosef Hochberg. Controlling the false discovery rate: a practical and powerful approach to multiple testing. *Journal of the Royal statistical society: series B (Methodological)*, 57(1):289–300, 1995.
- [24] R Core Team et al. R: A language and environment for statistical computing. 2013.
- [25] Inge Verheggen, Joost JA de Jong, Martin PJ van Boxtel, Ed HBM Gronenschild, Walter M Palm, Alida A Postma, Jacobus FA Jansen, Frans RJ Verhey, and Walter H Backes. Increase in blood–brain barrier leakage in healthy, older adults. *Geroscience*, 42(4):1183–1193, 2020.
- [26] Sam E Day, Mikko I Kettunen, Ferdia A Gallagher, De-En Hu, Mathilde Lerche, Jan Wolber, Klaes Golman, Jan Henrik Ardenkjaer-Larsen, and Kevin M Brindle. Detecting tumor response to treatment using hyperpolarized  $^{13}\text{C}$  magnetic resonance imaging and spectroscopy. *Nature medicine*, 13(11):1382, 2007.
- [27] James Prichard, Douglas Rothman, Edward Novotny, Ognen Petroff, Takeo Kuwabara, Malcolm Avison, Alistair Howseman, Christopher Hanstock, and Robert Shulman. Lactate rise detected by  $^1\text{H}$  nmr in human visual cortex during physiologic stimulation. *Proceedings of the National Academy of Sciences of the United States of America*, 88(13):5829, 1991.
- [28] Klaus-Dietmar Merboldt, Harald Bruhn, Wolfgang Hanicke, Thomas Michaelis, and Jens Frahm. Decrease of glucose in the human visual cortex during photic stimulation. *Magnetic resonance in medicine*, 25(1):187–194, 1992.
- [29] Igor D Grachev and A Vania Apkarian. Chemical heterogeneity of the living human brain: a proton mr spectroscopy study on the effects of sex, age, and brain region. *Neuroimage*, 11(5):554–563, 2000.
- [30] Matthew E Merritt, Crystal Harrison, Charles Storey, F Mark Jeffrey, A Dean Sherry, and Craig R Malloy. Hyperpolarized  $^{13}\text{C}$  allows a direct measure of flux through a single enzyme-catalyzed step by nmr. *Proceedings of the National Academy of Sciences*, 104(50):19773–19777, 2007.
